# Supplementary material for: Pan-cancer analysis of genomic scar signatures associated with homologous recombination deficiency suggests novel indications for existing cancer drugs
Source: PubMed Central journal article supplement (PMC4443545; doi:10.1186/s40364-015-0033-4), 2015-05-01

**TCGA ovarian cancer**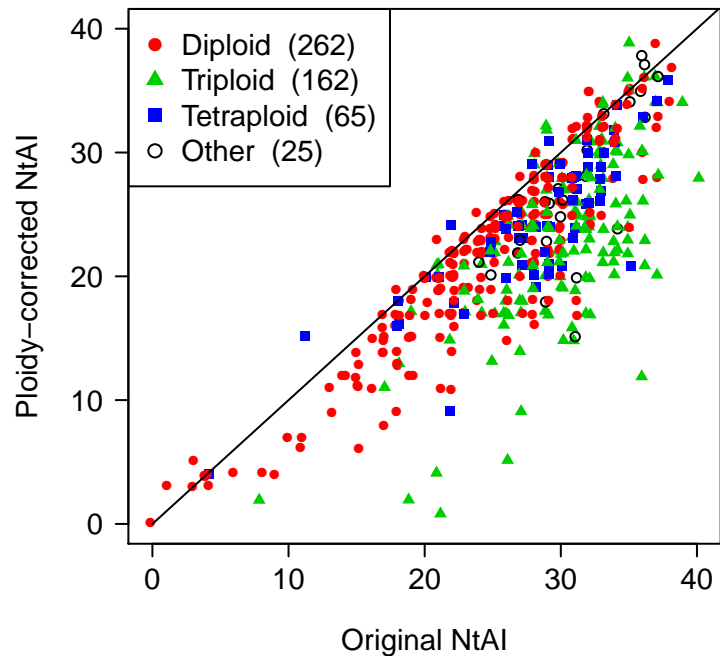**TCGA ovarian cancer  
Original NtAI**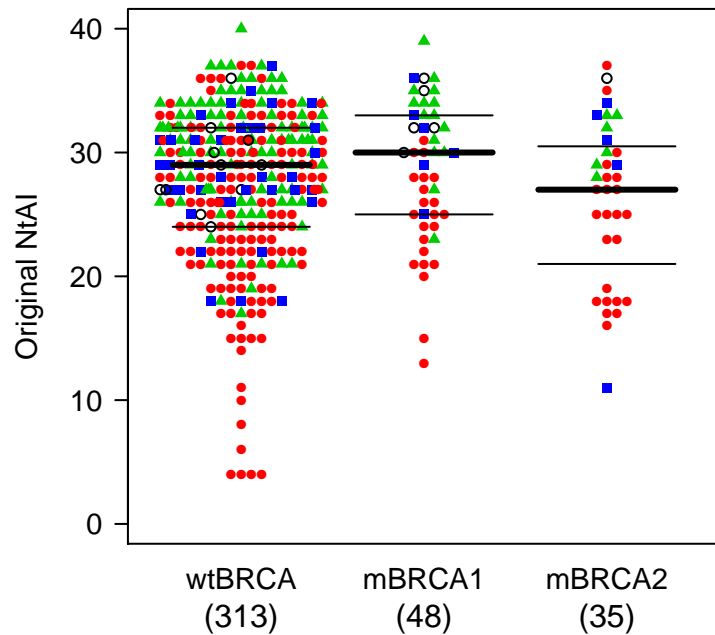**TCGA ovarian cancer  
Ploidy corrected NtAI**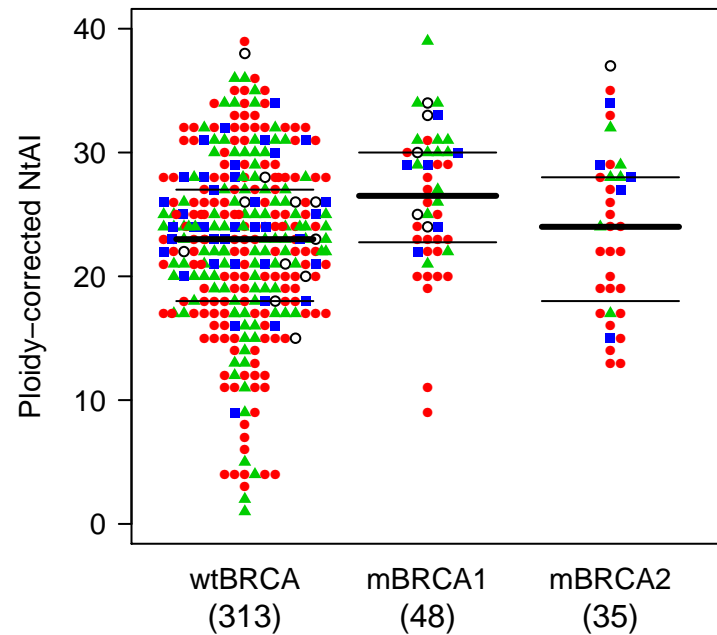

Supplement: 40364_2015_33_MOESM1_ESM.pdf [file 40364_2015_33_MOESM1_ESM.pdf]
