# Supplementary material for: Pan-cancer analysis of genomic scar signatures associated with homologous recombination deficiency suggests novel indications for existing cancer drugs
Source: PubMed Central journal article supplement (PMC4443545; doi:10.1186/s40364-015-0033-4), 2015-05-01
Supplement: 40364_2015_33_MOESM2_ESM.pdf [file 40364_2015_33_MOESM2_ESM.pdf]

# BRCA

NtAI

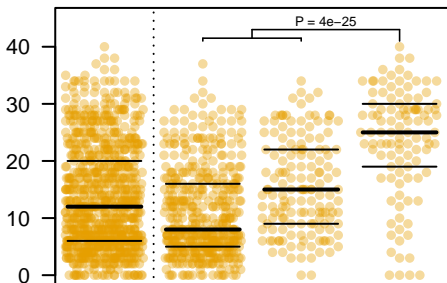

LST

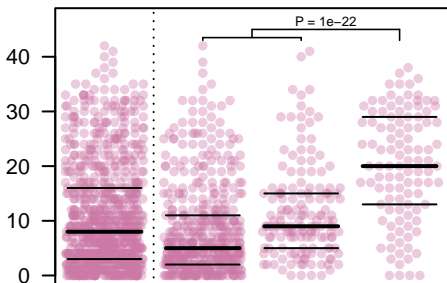

HRD-LOH

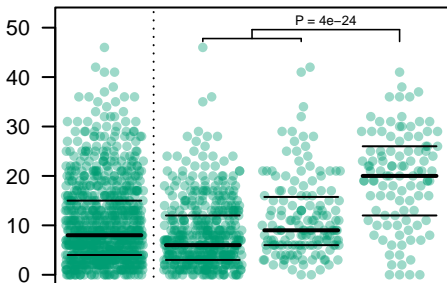

All  
(877)

ER  
(481)

HER2  
(150)

TNBC  
(105)
